# Supplementary material
Source: MDPI journal article supplement (https://www.mdpi.com/2673-9410/4/1/4)

**Figure S2.** *In vivo* pictures of some marine macroalgae from the Azores analyzed in the present study. Ochrophyta: A) *Colpomenia sinuosa*; B) *Fucus spiralis*; C) *Padina gymnospora*; D) *Scytosiphon lomentaria*. Rhodophyta: E) *Amphiroa beauvoisii*; F) *Gelidium microdon*; G) *Hypnea musciformis*; H) *Laurencia pyramidalis*; I) *Lomentaria articulata*. Chlorophyta: J) *Ulva australis*; K) *Ulva compressa*; and L) *Ulva lacinulata*. Scale bar = 1cm.

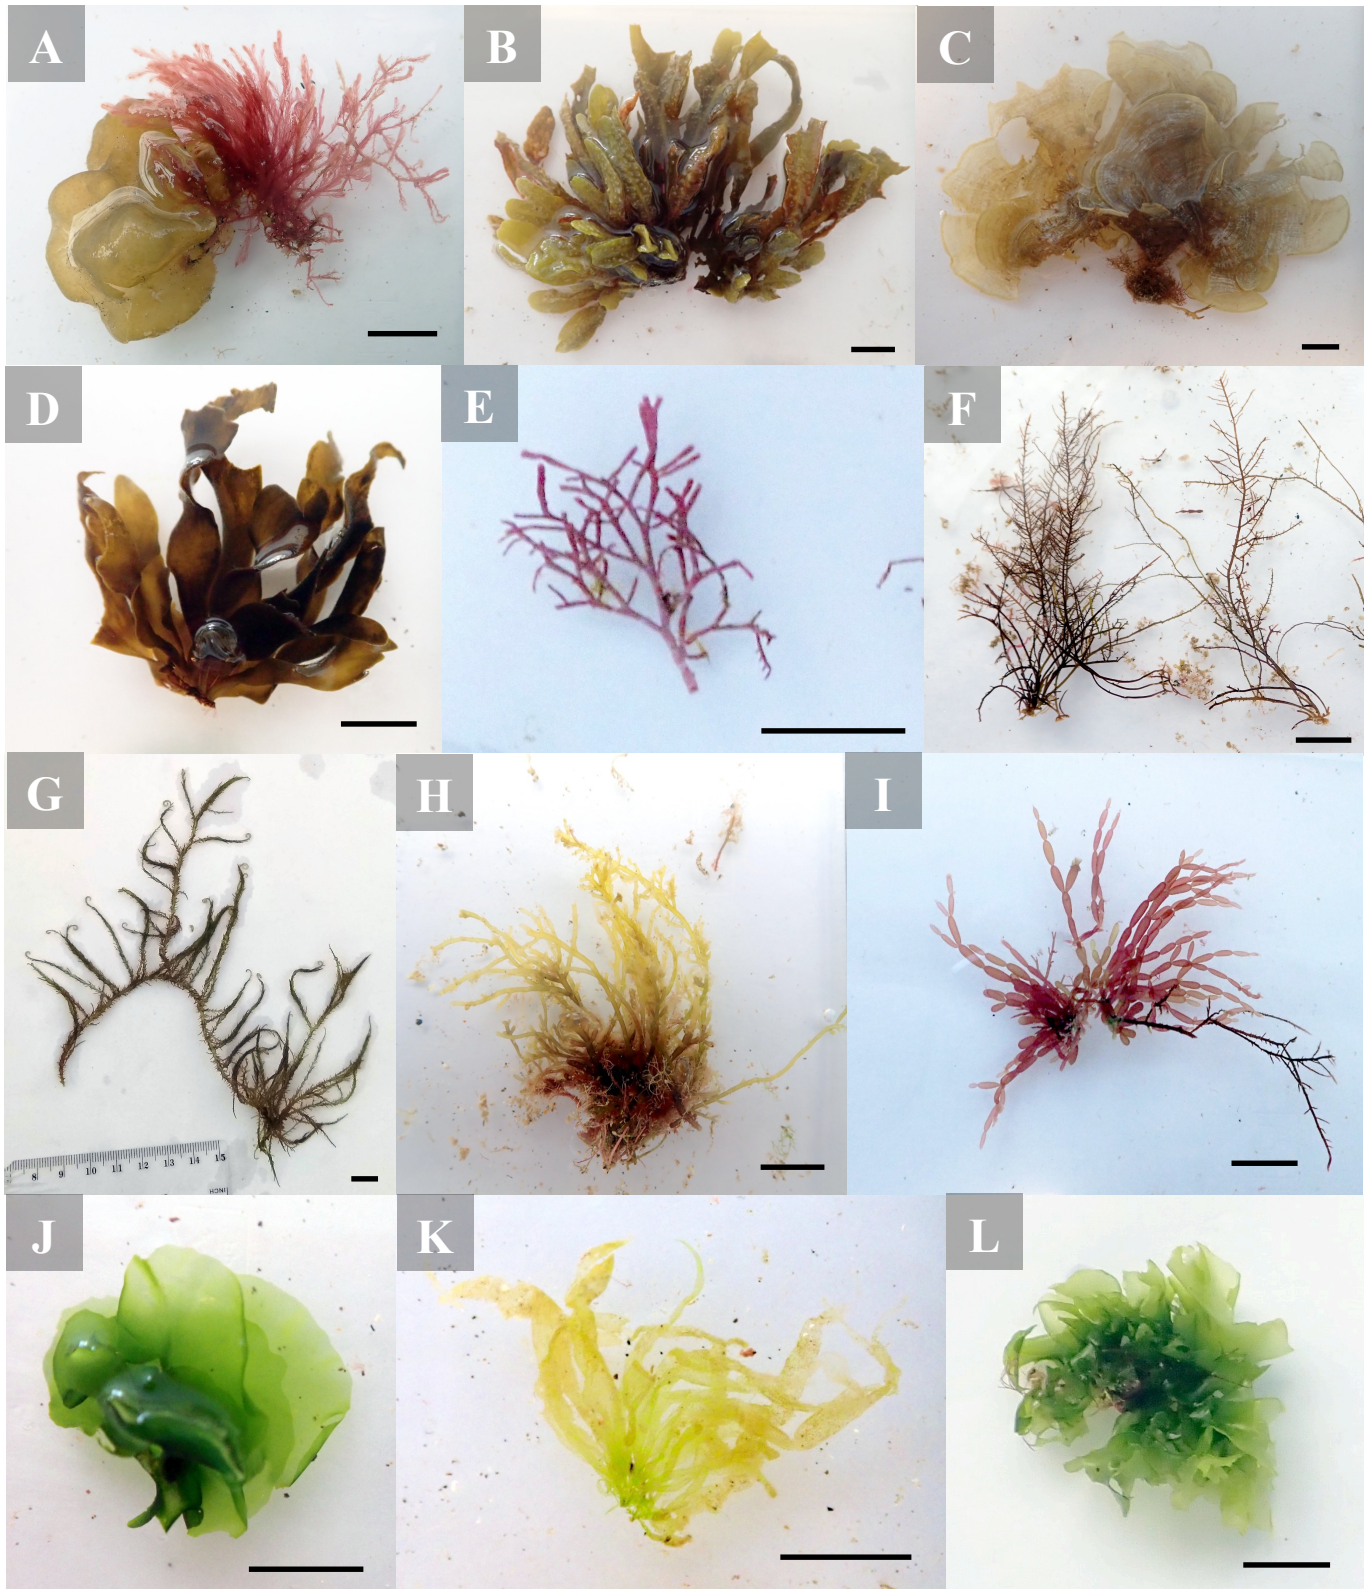

Supplement: s1 [file s1]
