# Supplementary material
Source: MDPI journal article supplement (https://www.mdpi.com/2673-9410/4/1/4)

**Figure S1.** Collection sites. São Miguel: A) Caloura; B) Atalhada; C) Praia do Pópulo; D) São Vicente de Ferreira; E) Mosteiros. Santa Maria: F) Maia; G) Praia Formosa; and H) Anjos.

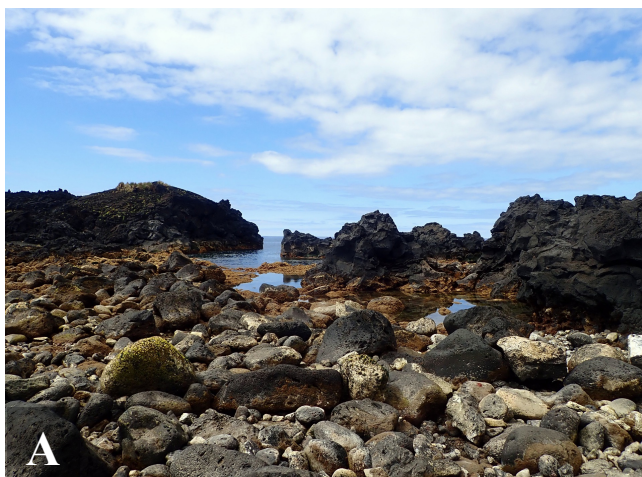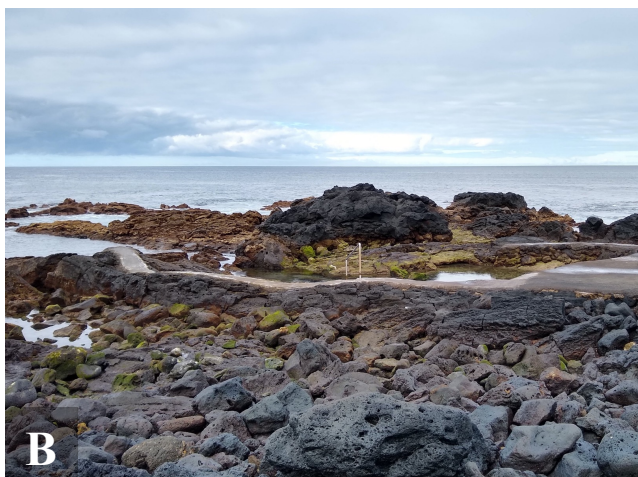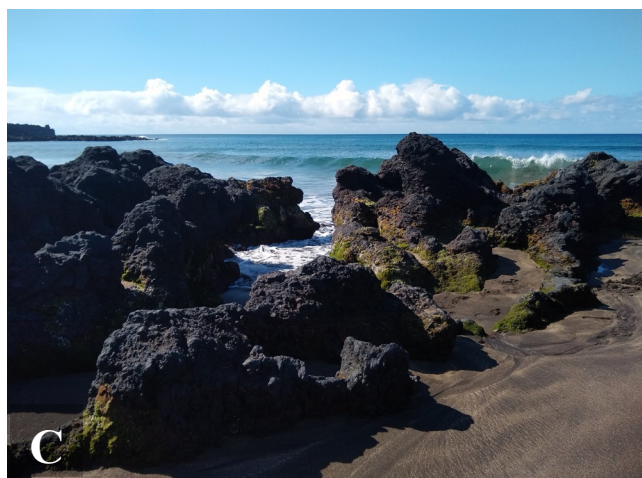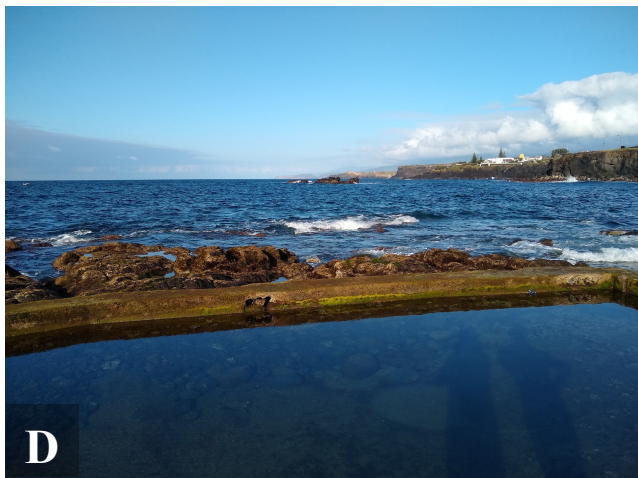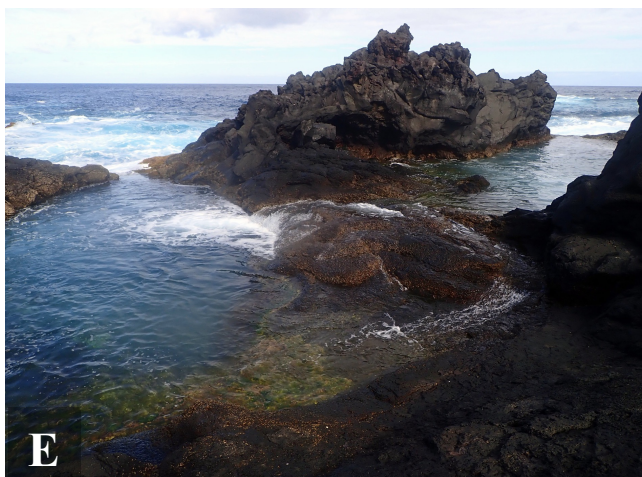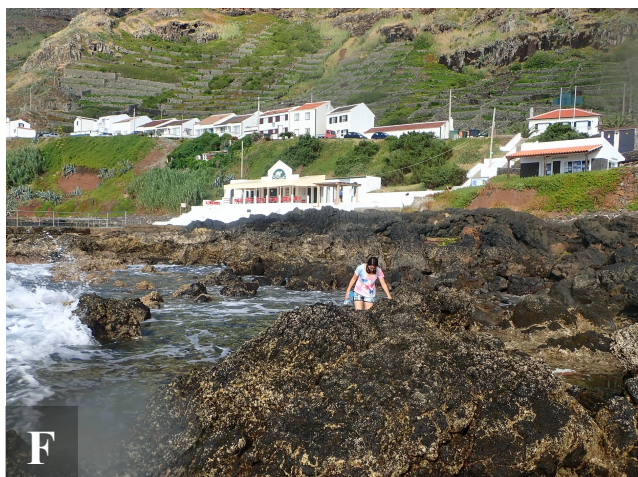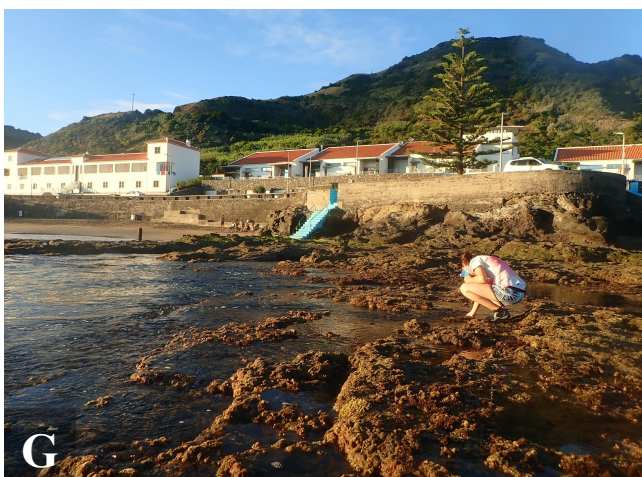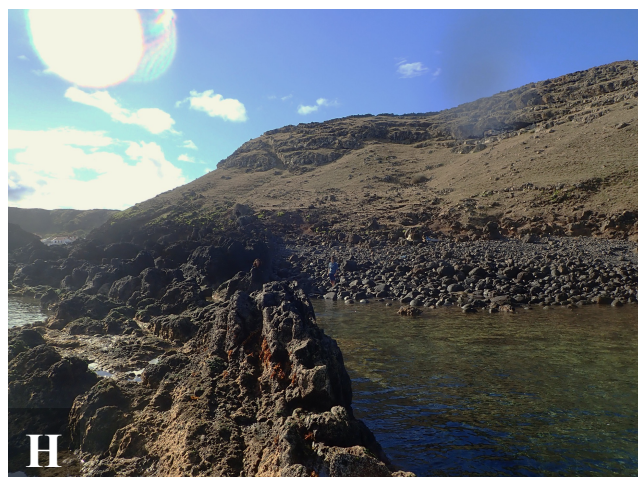

Supplement: s1 [file s1]
